# Supplementary material
Source: Research Square preprint supplement (doi:10.21203/rs.3.rs-10238866/v1)
Supplement: Supplementary file 1 [file 73a670d61d56c20e4832b965.docx]

# Supplementary Materials

**EEG Microstate Aggregate Conditional Entropy Derived from Markov Modelling as an AD-Specific Biomarker**
Hassan Farooq, Sargodha Medical College, Sargodha, Pakistan

## Supplementary Table S1. GFP Amplitude Threshold Sensitivity

| **Threshold condition** | **KW p-value range** | **AD permutation p** |
| --- | --- | --- |
| No threshold (all local maxima) | 0.023–0.025 | < 0.01 |
| Mean − 0.5 SD | 0.023–0.025 | < 0.01 |
| Mean + 0.5 SD | 0.023–0.025 | < 0.01 |

*ACE(T) group differences were stable across three GFP peak-detection thresholds, indicating the result is not an artefact of peak-picking sensitivity.*

## Supplementary Table S2. Epoch-Length Sensitivity

| **Epoch length** | **KW p** | **AUC (AD vs HC)** |
| --- | --- | --- |
| 60 s | 0.011 | 0.726 |
| 90 s | 0.015 | 0.720 |
| Full recording | 0.024 | 0.691 |

*Shorter epochs yielded numerically higher AUC, but the effect direction and significance were consistent across all lengths, supporting the feasibility of a 60-s clinical acquisition protocol.*

## Supplementary Table S3. Leave-One-Out (LOO) Stability

- H-statistic range across 85 folds: 6.562–8.928
- AD vs. HC AUC range: 0.679–0.710 (mean = 0.691)
- Subjects exceeding 3× mean absolute AUC-shift deviation: sub-019, sub-033, sub-039, sub-040, sub-047, sub-048
- After excluding these six: KW p = 0.018–0.026; AUC = 0.681–0.698

*No single participant drives the primary result.*

## Supplementary Table S4. First-Order Markov Assumption Validation (n = 20 subsample: 8 HC, 7 AD, 5 FTD)

| **Metric** | **Result** |
| --- | --- |
| BIC preference for 1st-order model | 17/20 participants (85%) |
| LRT rejections of 1st-order model (α=0.05, Bonferroni-corrected) | 3/20 |
| Median ΔBIC (1st − 2nd order) | +38.2 (IQR 12.4–67.1) |

*Positive ΔBIC favours the simpler first-order model; the second-order model's added parameters are not justified in the large majority of participants.*

## Supplementary Code and Data Availability

Full pipeline: Farooq, H. (2025). EEG Microstate ACE Pipeline. Zenodo. https://doi.org/10.5281/zenodo.20756169
Raw data: OpenNeuro ds004504 — https://openneuro.org/datasets/ds004504

.
